# Supplementary material
Source: Royal Society of Chemistry journal article supplement (doi:10.1039/d6tb00226a)
Supplement: d6tb00226a1.pdf [file d6tb00226a1.pdf]

## Supplementary information

### ***In Vitro* Models of Oxidative Stress, Mitochondrial Dysfunction and Inflammation for Evaluation of Neuroprotective Biomaterials**

Fucen Luo<sup>a</sup>, Thelma Akanchise<sup>a</sup>, Borislav Angelov<sup>b</sup>, and Angelina Angelova<sup>\*a</sup>

<sup>a</sup>. Université Paris-Saclay, CNRS, Institut Galien Paris-Saclay, 91400 Orsay, France,

<sup>b</sup>. Extreme Light Infrastructure ERIC, CZ-25241 Dolni Brezany, Czech Republic.

\*Corresponding author: [angelina.angelova@universite-paris-saclay.fr](mailto:angelina.angelova@universite-paris-saclay.fr)

**Table S1** Composition of lipid nanoparticles and the respective mass proportions of the components

| Sample Code | Formulations of Lipid Nanoparticles                                          |
|-------------|------------------------------------------------------------------------------|
| MPLu        | Monoolein (90%)/Pluronic F127(10%)                                           |
| MPL         | Monoolein (30%)/Plasmalogen (60%)/Pluronic F127(10%)                         |
| MPL-MT      | Monoolein (28.4%)/Plasmalogen (56.6%)/Pluronic F127 (10%)/<br>Melatonin (5%) |
| MPL-Quer    | Monoolein (29.4%)/Plasmalogen (58.6%)/Pluronic F127 (10%)/<br>Quercetin (2%) |

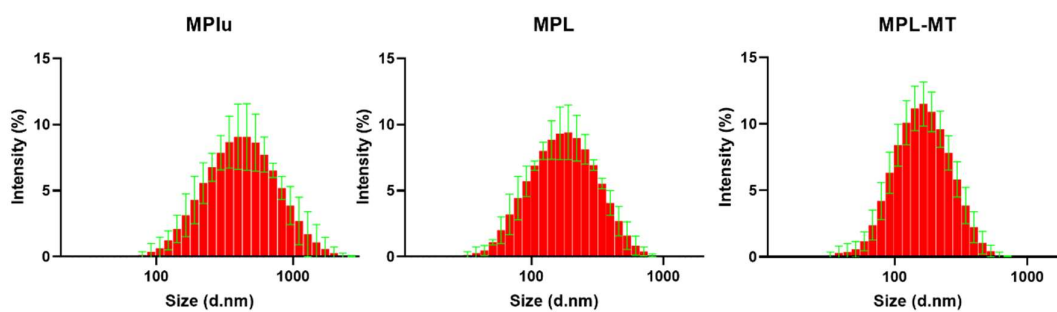

| Sample    | MPLu          | MPL           | MPL-MT        |
|-----------|---------------|---------------|---------------|
| size (nm) | 329.4 ± 3.1   | 154.5 ± 3.6   | 146.3 ± 2.15  |
| PDI       | 0.276 ± 0.012 | 0.252 ± 0.020 | 0.219 ± 0.010 |

**Figure S1.** Size distributions and Polydispersity index (PDI) of liquid crystalline nanoparticles (MPLu, MPL, MPL-MT) determined by dynamic light scattering. Data are presented as average ± SD (n=3).
